# Supplementary figures and images for: Toxicity of Jegosaponins A and B from Styrax japonica Siebold et al. Zuccarini in Prostate Cancer Cells and Zebrafish Embryos Resulting from Increased Membrane Permeability
Source: MDPI journal article supplement (doi:10.3390/ijms22126354), 2021-06-14

20200108-Egonoki-10-4-2-C5D5N 10 1 C:\Bruker\TopSpin4.0.2\examdata

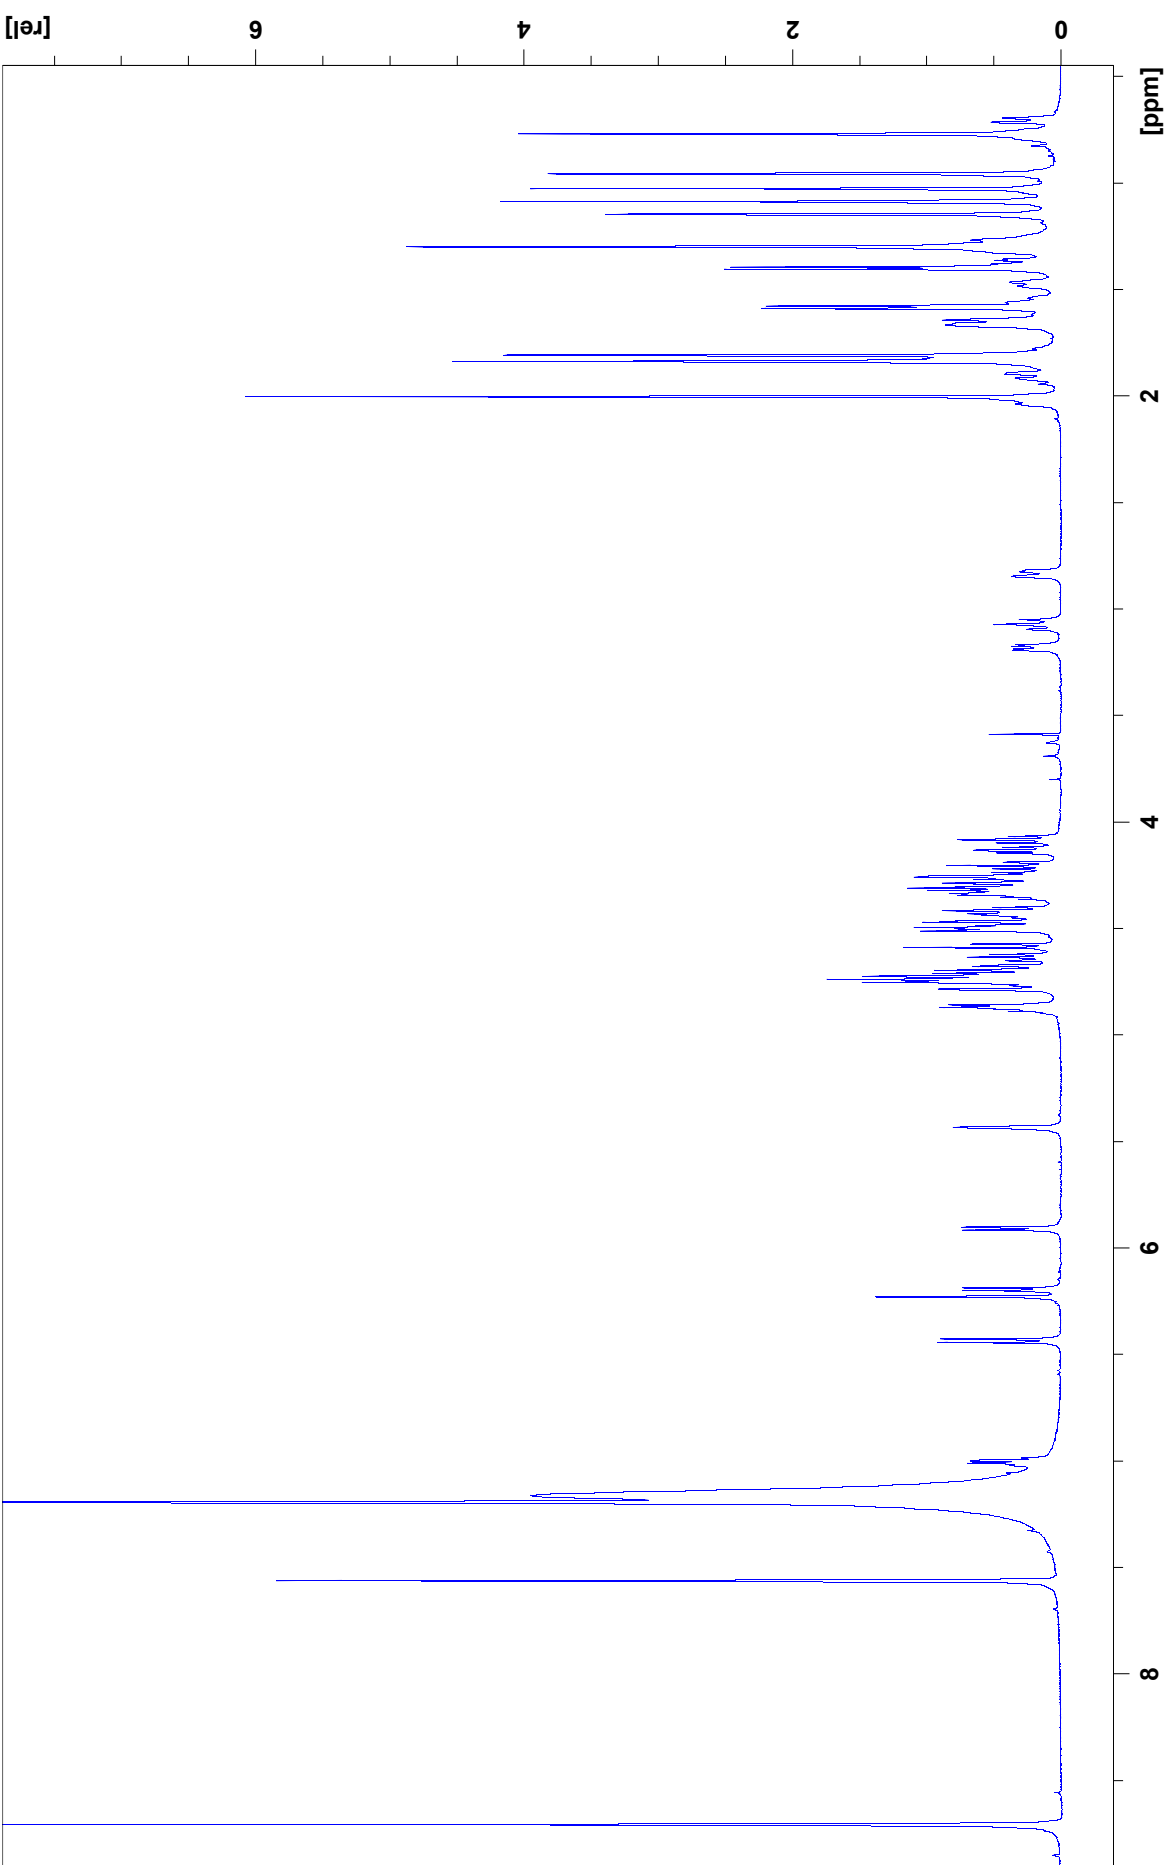

Supplement: s1 [file s1]

20200108-Egonoki-10-4-2-C5D5N 11 1 C:\Bruker\TopSpin4.0.2\examdata

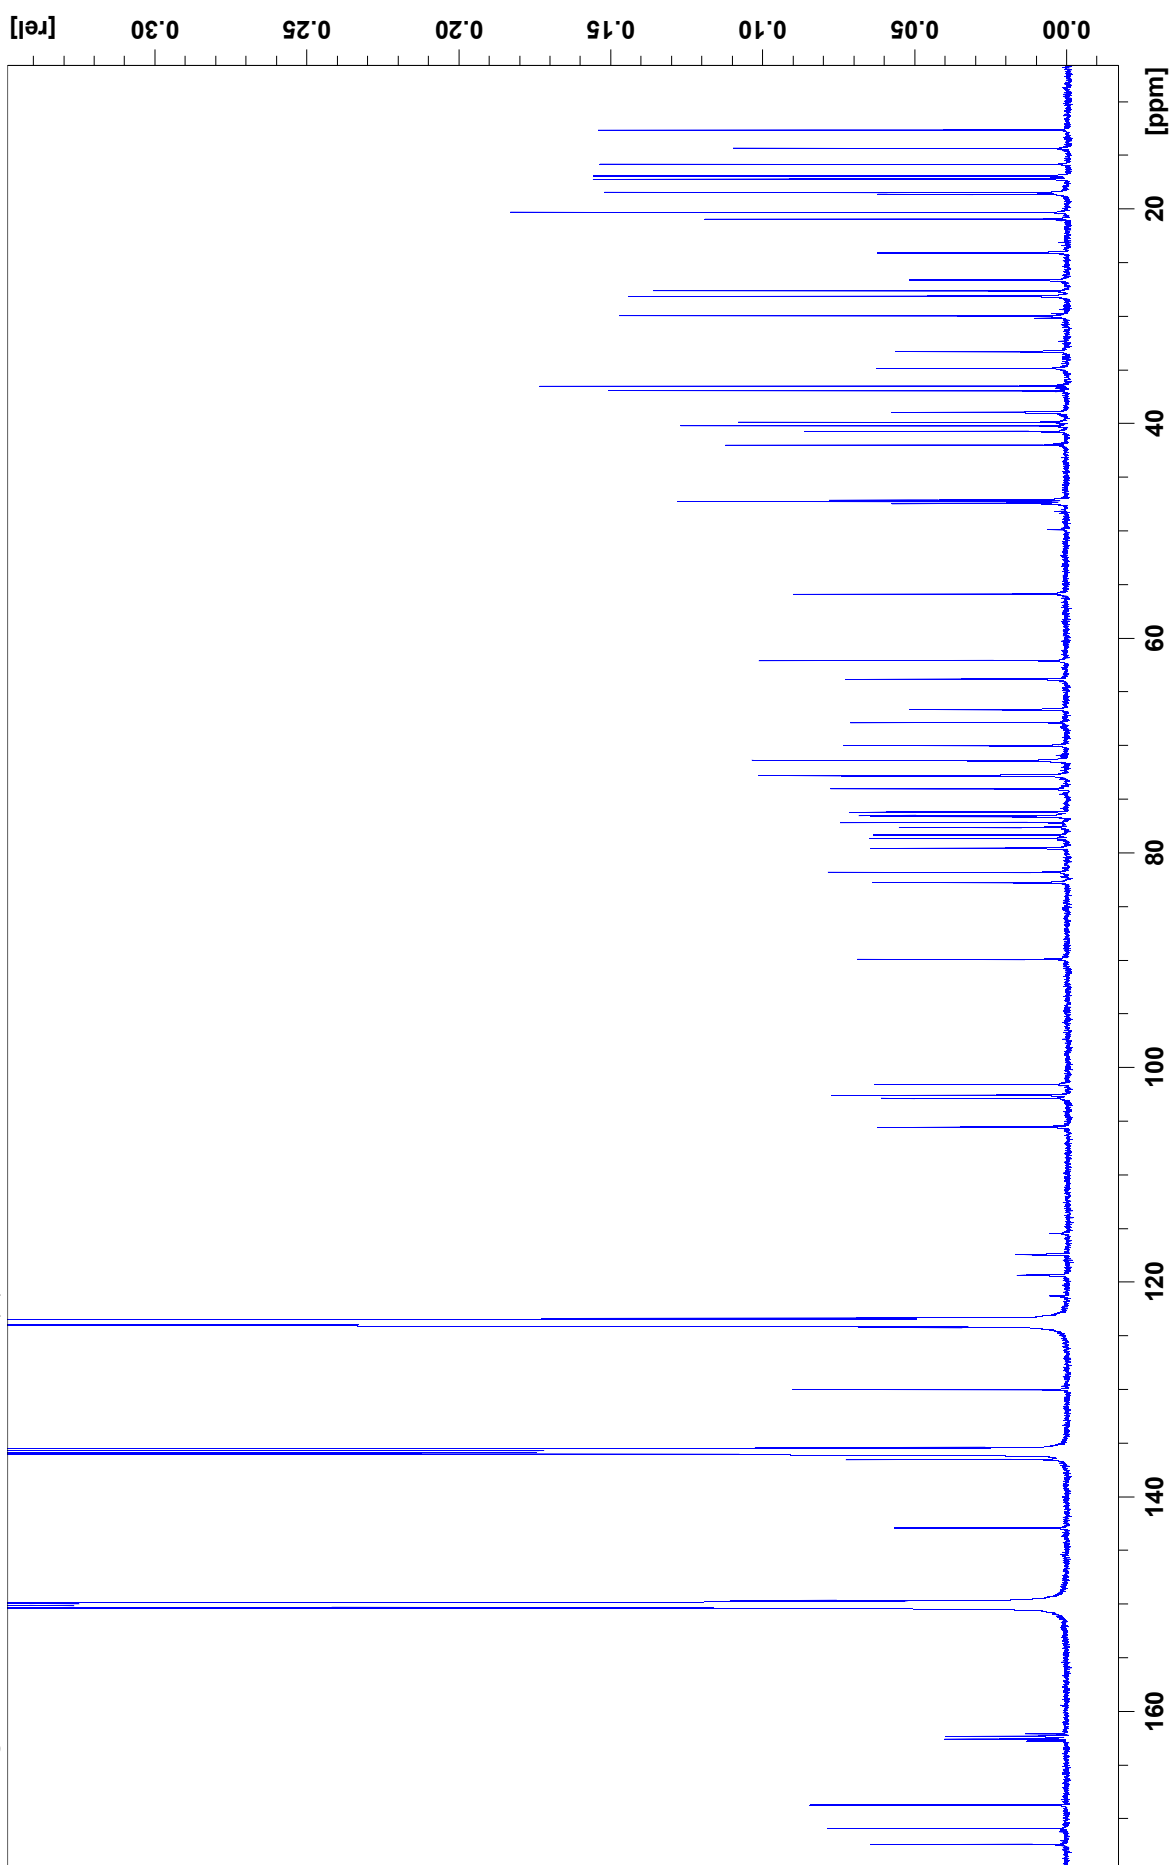

Supplement: s1 [file s1]

20191119-Egonoki-10-4-1-py 13 1 C:\Bruker\TopSpin4.0.2\examdata

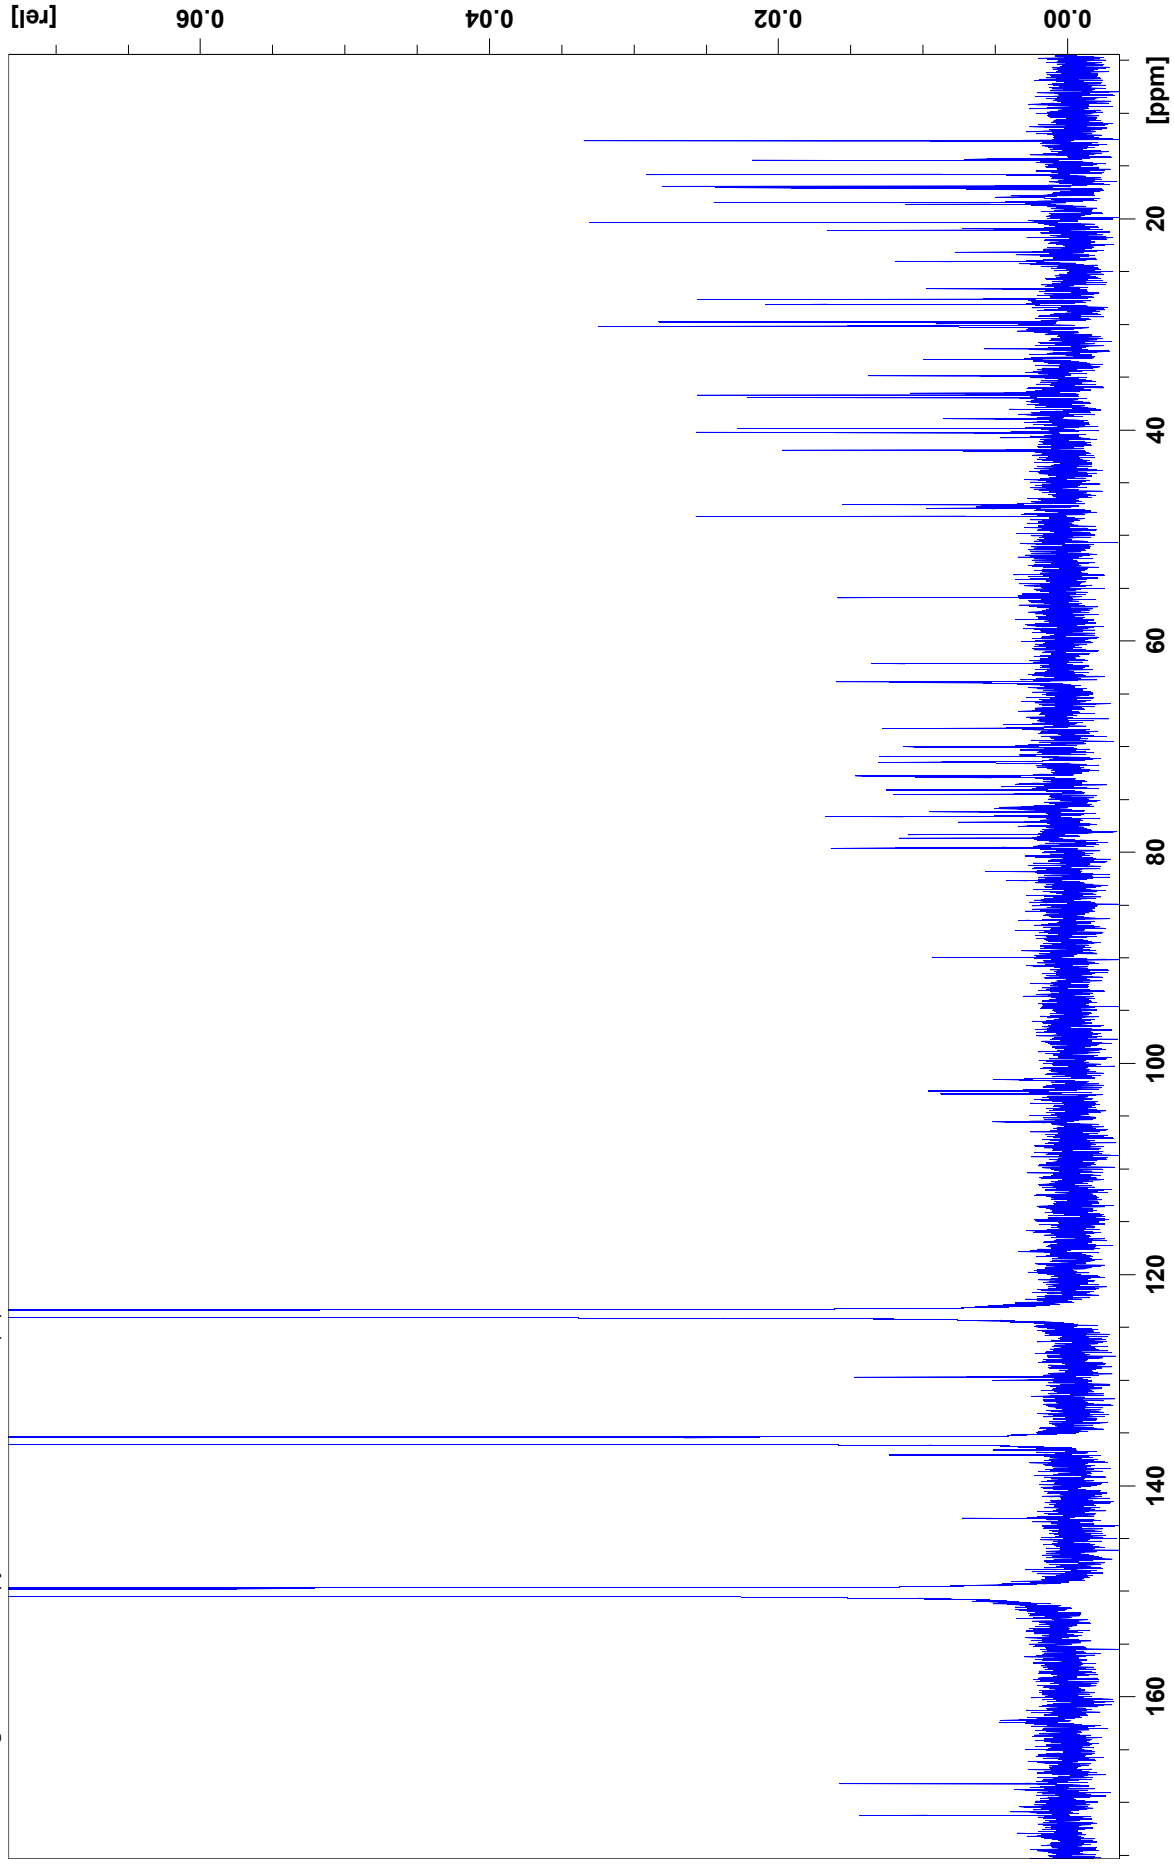

Supplement: s1 [file s1]

20191119-Egonoki-10-4-1-py 10 1 C:\Bruker\TopSpin4.0.2\examdata

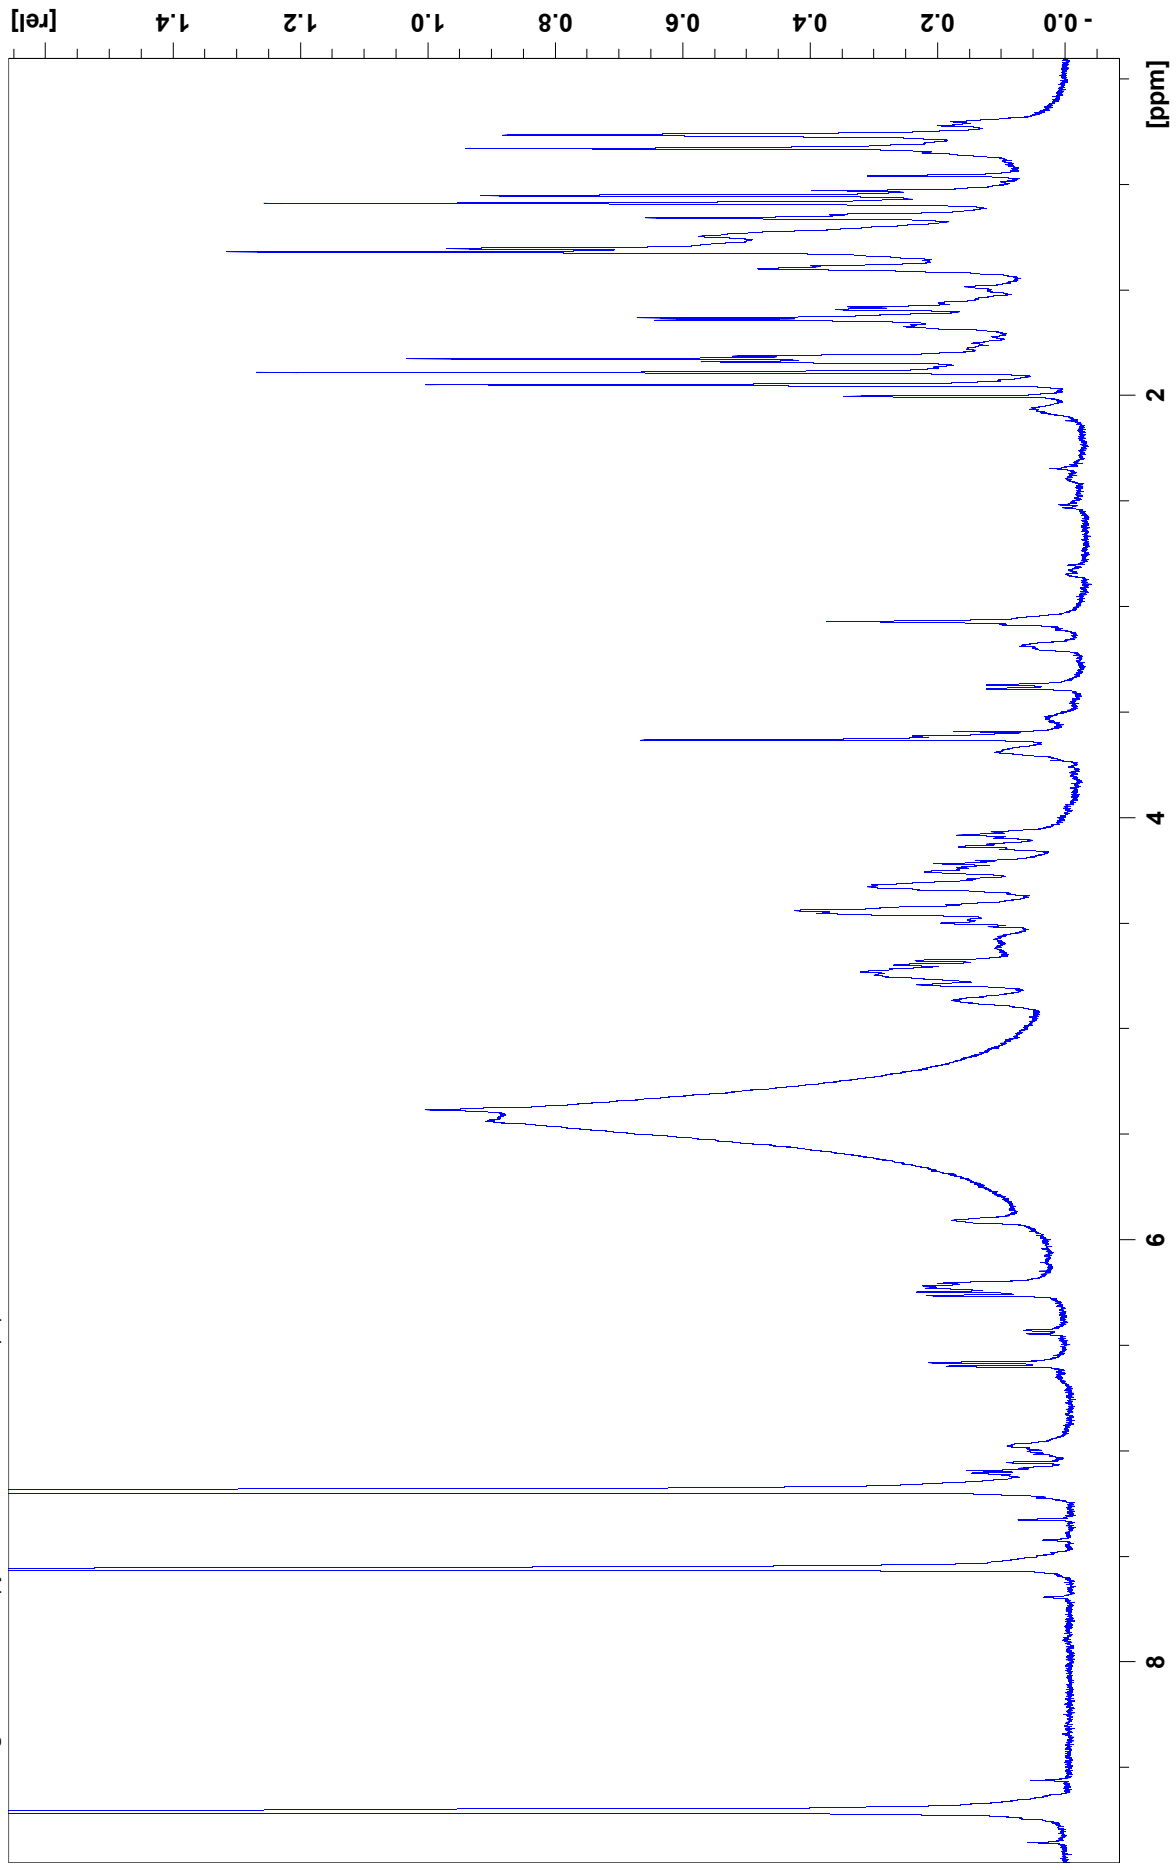

Supplement: s1 [file s1]
